# Supplementary material for: Avian top predator and the landscape of fear: responses of mammalian mesopredators to risk imposed by the golden eagle
Source: PubMed Central journal article supplement (PMC4314280; doi:10.1002/ece3.1370), 2015-01-05
Supplement: ece30005-0503-sd1.pdf [file ece30005-0503-sd1.pdf]

SUPPLEMENTARY INFORMATION

**Avian top predator and the landscape of fear: responses of mammalian mesopredators to risk imposed by the golden eagle**

Mari S. Lyly\*, Alexandre Villers, Elina Koivisto, Pekka Helle, Tuomo Ollila & Erkki Korpimäki

\*Corresponding author: Tel: +358 2333 5813; Fax +358 2333 6568; E-mail: mari.s.lyly@utu.fi

**Table S1.** The results of selected GAMM models for red fox and pine marten. Linear and additive variables are reported separately. Abbreviation acc.days refers to snow-track accumulation time in days, letters E and N denote the latitudinal and longitudinal coordinates, and DNN is the distance to nearest eagle nest. Letter  $\sigma$  is the amount of smoothing in the Gaussian kernel when calculating the territory and fledgling densities of golden eagle. EDF stands for estimated degrees of freedom.

| Red fox                                            |                         |                 |          |          | Pine marten                                        |                         |                 |          |          |
|----------------------------------------------------|-------------------------|-----------------|----------|----------|----------------------------------------------------|-------------------------|-----------------|----------|----------|
| <b>Territory density (<math>\sigma</math> 4km)</b> | <b>Fixed effects</b>    | <b>Estimate</b> | <b>t</b> | <b>P</b> | <b>Territory density (<math>\sigma</math> 5km)</b> | <b>Fixed effects</b>    | <b>Estimate</b> | <b>t</b> | <b>P</b> |
|                                                    | intercept               | 1.858           | 146.014  | <0.001   |                                                    | intercept               | 0.102           | 5.121    | <0.001   |
|                                                    | territory density       | 0.022           | 2.305    | 0.0212   |                                                    | forest                  | 0.080           | 3.219    | 0.001    |
|                                                    | acc.days                | 0.126           | 22.961   | <0.001   |                                                    | acc.days                | 0.197           | 21.868   | <0.001   |
|                                                    | <b>Additive effects</b> | <b>EDF</b>      | <b>F</b> | <b>P</b> |                                                    | <b>Additive effects</b> | <b>EDF</b>      | <b>F</b> | <b>P</b> |
|                                                    | s(E,N)                  | 25.27           | 40.019   | <0.001   |                                                    | s(territory density)    | 2.16            | 5.3      | 0.004    |
|                                                    | s(farmland)             | 2.44            | 8.413    | <0.001   |                                                    | s(E,N)                  | 24.43           | 14.506   | <0.001   |
|                                                    | s(forest)               | 1.62            | 15.326   | <0.001   |                                                    | s(red fox)              | 3.94            | 23.763   | <0.001   |
|                                                    | s(mountain hare)        | 4.93            | 408.155  | <0.001   |                                                    | s(farmland)             | 3.27            | 9.155    | <0.001   |
|                                                    |                         |                 |          |          |                                                    | s(mountain hare)        | 4.70            | 86.185   | <0.001   |
| <b>Fledgling density (<math>\sigma</math> 5km)</b> | <b>Fixed effects</b>    | <b>Estimate</b> | <b>t</b> | <b>P</b> | <b>Fledgling density (<math>\sigma</math> 5km)</b> | <b>Fixed effects</b>    | <b>Estimate</b> | <b>t</b> | <b>P</b> |
|                                                    | intercept               | 1.858           | 146.064  | <0.001   |                                                    | intercept               | 0.102           | 5.102    | <0.001   |
|                                                    | fledgling density       | -0.006          | -0.777   | 0.437    |                                                    | fledgling density       | 0.017           | 1.412    | 0.158    |
|                                                    | acc.days                | 0.126           | 22.979   | <0.001   |                                                    | forest                  | 0.079           | 3.159    | 0.002    |
|                                                    | <b>Additive effects</b> | <b>EDF</b>      | <b>F</b> | <b>P</b> |                                                    | acc.days                | 0.197           | 21.88    | <0.001   |
|                                                    | s(E,N)                  | 25.30           | 40.206   | <0.001   |                                                    | <b>Additive effects</b> | <b>EDF</b>      | <b>F</b> | <b>P</b> |
|                                                    | s(farmland)             | 2.42            | 8.112    | <0.001   |                                                    | s(E,N)                  | 24.58           | 14.2     | <0.001   |
|                                                    | s(forest)               | 1.58            | 15.483   | <0.001   |                                                    | s(red fox)              | 3.94            | 24.75    | <0.001   |
|                                                    | s(mountain hare)        | 4.93            | 408.331  | <0.001   |                                                    | s(farmland)             | 3.31            | 9.39     | <0.001   |
|                                                    |                         |                 |          |          |                                                    | s(mountain hare)        | 4.70            | 86.03    | <0.001   |
| <b>Distance to nearest nest</b>                    | <b>Fixed effects</b>    | <b>Estimate</b> | <b>t</b> | <b>P</b> | <b>Distance to nearest nest</b>                    | <b>Fixed effects</b>    | <b>Estimate</b> | <b>t</b> | <b>P</b> |
|                                                    | intercept               | 1.858           | 146.44   | <0.001   |                                                    | intercept               | 0.101           | 5.056    | <0.001   |
|                                                    | acc.days                | 0.126           | 22.93    | <0.001   |                                                    | forest                  | 0.084           | 3.38     | <0.001   |
|                                                    | <b>Additive effects</b> | <b>EDF</b>      | <b>F</b> | <b>P</b> |                                                    | acc.days                | 0.196           | 21.817   | <0.001   |
|                                                    | s(DNN)                  | 3.33            | 6.337    | <0.001   |                                                    | <b>Additive effects</b> | <b>EDF</b>      | <b>F</b> | <b>P</b> |
|                                                    | s(E,N)                  | 25.35           | 37.71    | <0.001   |                                                    | s(DNN)                  | 4.78            | 5.008    | <0.001   |
|                                                    | s(farmland)             | 2.76            | 8.055    | <0.001   |                                                    | s(E,N)                  | 24.24           | 11.309   | <0.001   |
|                                                    | s(forest)               | 1.47            | 15.756   | <0.001   |                                                    | s(red fox)              | 3.95            | 23.695   | <0.001   |
|                                                    | s(mountain hare)        | 4.93            | 409.588  | <0.001   |                                                    | s(farmland)             | 3.24            | 8.593    | <0.001   |
|                                                    |                         |                 |          |          |                                                    | s(mountain hare)        | 4.70            | 86.491   | <0.001   |
